# Supplementary material for: Reproducibility and its confounders of CMR feature tracking myocardial strain analysis in patients with suspected myocarditis
Source: PubMed Central journal article supplement (PMC9038796; doi:10.1007/s00330-021-08416-5), 2021-12-21
Supplement: 330_2021_8416_MOESM1_ESM.pdf [file 330_2021_8416_MOESM1_ESM.pdf]

## SUPPLEMENTAL MATERIAL

# Reproducibility and its Confounders of CMR Feature Tracking Myocardial Strain Analysis in Patients with Suspected Myocarditis

### TABLE OF CONTENTS

|                                                                                    |   |
|------------------------------------------------------------------------------------|---|
| Supplemental Table 1: Sequence Parameters.....                                     | 2 |
| Supplemental Figure 1: Data Inclusion.....                                         | 3 |
| Supplemental Figure 2: Heat Map of Agreement Confounders for 2D LV Parameters..... | 4 |
| Supplemental Table 2: Additional Patient Demographics.....                         | 5 |
| Supplemental Table 3: 2D Left Ventricular Agreement.....                           | 6 |
| Supplemental Table 4: 3D Left Ventricular Agreement.....                           | 7 |
| Supplemental Table 5: Right Ventricular Agreement.....                             | 8 |

## Supplemental Methods

### *Sample size rationale*

The sample size of n=125 was determined based on the rationale that up to 20% of data may be excluded, especially for right ventricular, 3D and diastolic measures, and a final data of 100 subjects is in line with the sample size used for reproducibility assessments of CMR feature tracking in healthy controls by Liu et al<sup>9</sup>, while allowing for multivariable analysis.

### *Image acquisition*

All ciné's were acquired with standard clinical ECG gated (retrospective) balanced steady state free precession sequences, based on the parameters displayed in Supplemental Table 1. Due to the retrospective nature of the sequence, temporal resolution was defined by the pre-specified phase number per cardiac cycle and the individuals RR-interval (ie. heart rate). Short-axis slices were acquired for the entire ventricles without a gap (distance factor: 0%), and long-axis views were acquired in two-, three- and four-chamber views.

**Supplemental Table 1: Sequence Parameters**

|                                                                          | <b>1.5T -GE</b> | <b>1.5T - Siemens</b> | <b>3T - Siemens</b> |
|--------------------------------------------------------------------------|-----------------|-----------------------|---------------------|
| <b>Sequence Name</b>                                                     | FIESTA          | TrueFISP              | TrueFISP            |
| <b>Matrix</b>                                                            | 192*160         | 208*126               | 192*144             |
| <b>Bandwidth (Hz/Px)</b>                                                 | 977             | 925                   | 930                 |
| <b>Slice thickness (mm)</b>                                              | 8.0             | 8.0                   | 8.0                 |
| <b>Flip Angle (°)</b>                                                    | 45              | 50                    | 45                  |
| <b>Echo Time, TE (ms)</b>                                                | 1.50            | 1.10                  | 1.31                |
| <b>Repetition Time, TR (ms)</b>                                          | 54 (3.4)        | 42 (2.6)              | 54 (3.6)            |
| <b>Phase Number</b>                                                      | 30              | 25-30                 | 25                  |
| <b>Calculated temporal resolution<br/>(for an RR-interval of 1000ms)</b> | 33ms            | 33-40ms               | 40ms                |

### *Detailed strain analysis*

Analysis was performed on the short axis stack and three long axis views, as displayed in Figure 1. Readers visually determined the end-diastolic phase. Using an automatic contouring tool, endocardial and epicardial contours were placed on the diastolic phase and reviewed by the readers and corrected if required. The contours excluding papillaries and trabecles, as well as outflow and inflow planes. Afterwards the feature tracking analysis was run using the end-diastolic frame as reference using the software from Circle Cardiovascular Imaging, version 5.9. Readers then visually verified the tracking, and if required readers adjusted the contours and repeated the above steps. If tracking was not acceptable after adjustments, the data set was excluded as shown in Supplemental Figure 1.

## Supplemental Figure 1: Data Inclusion

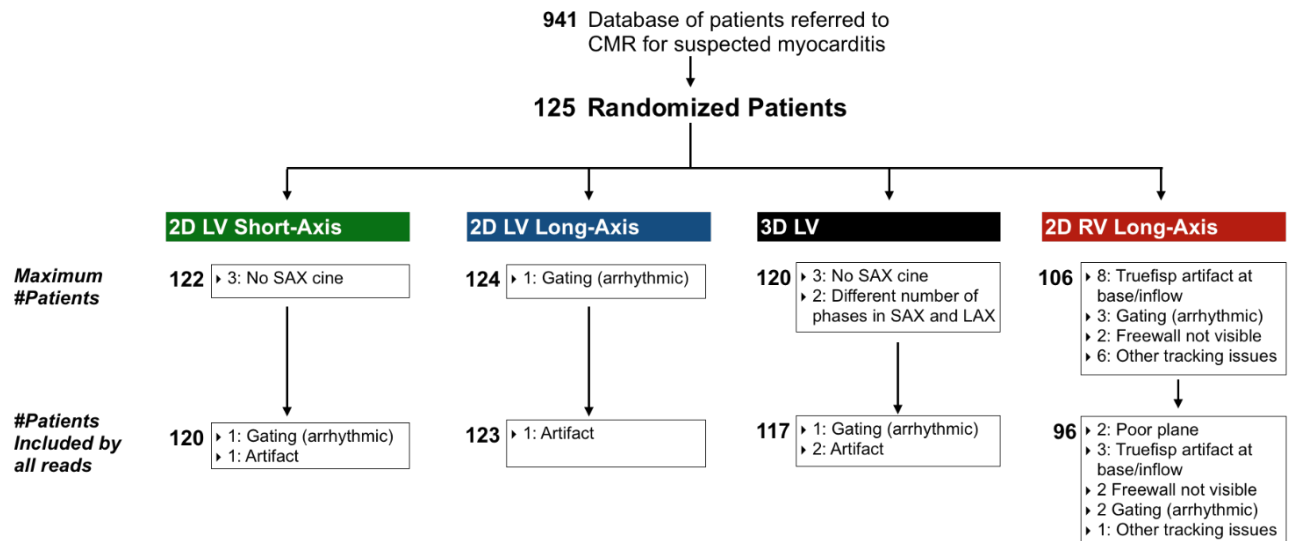

Inclusion per plane was first displayed by the maximum number of patients available (those who all three reads agreed to exclude), then by patients in which there was disagreement in exclusion, resulting in the final number of patients all reads agreed to include. 2D: two-dimension, 3D: three-dimension, LAX: long-axis, LV: Left ventricle, RV: Right Ventricle, SAX: short-axis.

## Supplemental Figure 2: Heat Map of Agreement Confounders for 2D LV Parameters

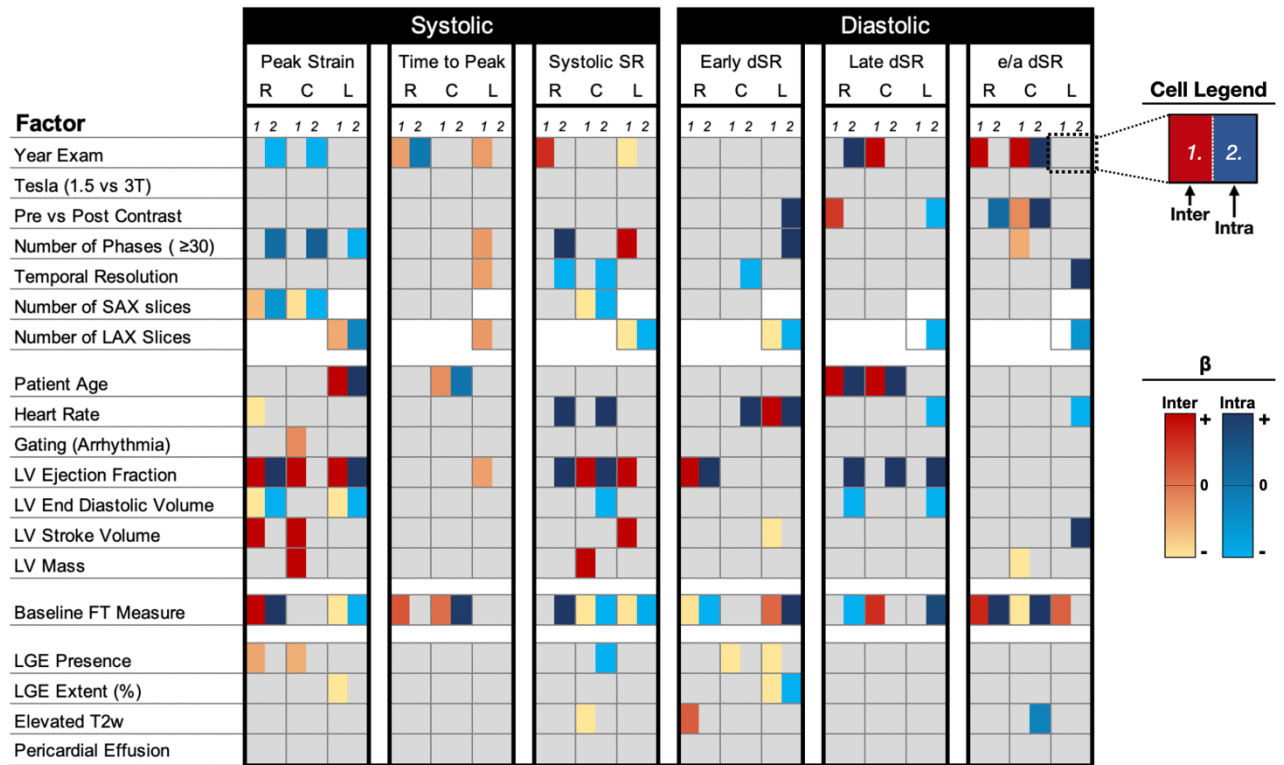

The heat map depicts beta estimates from significant univariate regression between potential confounders and the difference in agreement ( $|\Delta|$ ) for 2D left ventricular feature tracking measurements for each orientation, R: radial, C: Circumferential. For each measurement, the left half-cell represents the assessment of inter-reader agreement and the right represents intra-reader agreement. Non-significant assessments are marked by a grey square.

**Supplemental Table 2: Additional Patient Demographics**

|                                      |            |
|--------------------------------------|------------|
| Age (years)                          | 45 ± 16    |
| Sex (females)                        | 51 (41%)   |
| Body mass index (kg/m <sup>2</sup> ) | 27.5 ± 6.4 |
| <b>Medical History</b>               |            |
| Diabetes mellitus                    | 8 (6%)     |
| Hypertension                         | 27 (22%)   |
| Heart failure                        | 19 (15%)   |
| Cholesterolemia                      | 21 (17%)   |
| Current smoker                       | 19 (15%)   |
| New York Heart Association           |            |
| Grade II                             | 15 (12%)   |
| Grade III                            | 16 (13%)   |
| Grade IV                             | 3 (2%)     |
| <b>Medications</b>                   |            |
| Beta blockers                        | 38 (30%)   |
| Calcium Channel Antagonists          | 6 (5%)     |
| ACE Inhibitors                       | 38 (30%)   |
| Statins                              | 20 (16%)   |
| Acetylsalicylic acid                 | 32 (26%)   |
| Diuretics                            | 21 (17%)   |

Mean±SD or frequency (percentage) are displayed for patient characteristics at the time of the CMR exam.

**Supplemental Table 3: 2D Left Ventricular Agreement**

| Factor                                  | Average Measure | Inter-reader     |         |                                  | Intra-reader     |         |                                  |
|-----------------------------------------|-----------------|------------------|---------|----------------------------------|------------------|---------|----------------------------------|
|                                         |                 | ICC (95% CI)     | p-value | Absolute Disagreement $ \Delta $ | ICC (95% CI)     | p-value | Absolute Disagreement $ \Delta $ |
| <b>Peak Strain (%)</b>                  |                 |                  |         |                                  |                  |         |                                  |
| Radial (SAX)                            | 23.5 ± 9.9      | 0.99 (0.97-0.99) | <0.001  | 1.8 ± 1.6                        | 0.99 (0.99-0.99) | <0.001  | 1.2 ± 1.3                        |
| Circumferential                         | -14.7 ± 4.7     | 0.99 (0.98-0.99) | <0.001  | 0.8 ± 0.7                        | 0.99 (0.99-0.99) | <0.001  | 0.6 ± 0.6                        |
| Longitudinal                            | -13.3 ± 3.9     | 0.96 (0.91-0.98) | <0.001  | 1.3 ± 1.1                        | 0.96 (0.95-0.97) | <0.001  | 1.1 ± 1.2                        |
| <b>Time to Peak Strain (ms)</b>         |                 |                  |         |                                  |                  |         |                                  |
| Radial (SAX)                            | 304 ± 53        | 0.96 (0.94-0.97) | <0.001  | 9 ± 19                           | 0.98 (0.97-0.98) | <0.001  | 7 ± 14                           |
| Circumferential                         | 307 ± 55        | 0.88 (0.83-0.92) | <0.001  | 14 ± 36                          | 0.91 (0.88-0.94) | <0.001  | 11 ± 32                          |
| Longitudinal                            | 323 ± 54        | 0.71 (0.59-0.80) | <0.001  | 32 ± 49                          | 0.83 (0.75-0.88) | <0.001  | 27 ± 40                          |
| <b>Systolic Strain Rate (/s)</b>        |                 |                  |         |                                  |                  |         |                                  |
| Radial (SAX)                            | 1.32 ± 0.58     | 0.99 (0.98-0.99) | <0.001  | 0.11 ± 0.09                      | 0.99 (0.98-0.99) | <0.001  | 0.09 ± 0.09                      |
| Circumferential                         | -0.85 ± 0.28    | 0.98 (0.97-0.99) | <0.001  | 0.06 ± 0.05                      | 0.97 (0.96-0.98) | <0.001  | 0.06 ± 0.07                      |
| Longitudinal                            | -0.76 ± 0.20    | 0.88 (0.79-0.92) | <0.001  | 0.11 ± 0.11                      | 0.88 (0.83-0.92) | <0.001  | 0.11 ± 0.11                      |
| <b>Early Diastolic Strain Rate (/s)</b> |                 |                  |         |                                  |                  |         |                                  |
| Radial (SAX)                            | -1.41 ± 0.70    | 0.96 (0.94-0.97) | <0.001  | 0.17 ± 0.23                      | 0.97 (0.96-0.98) | <0.001  | 0.14 ± 0.20                      |
| Circumferential                         | 0.84 ± 0.33     | 0.94 (0.91-0.96) | <0.001  | 0.08 ± 0.14                      | 0.95 (0.93-0.97) | <0.001  | 0.08 ± 0.13                      |
| Longitudinal                            | 0.71 ± 0.25     | 0.86 (0.79-0.90) | <0.001  | 0.13 ± 0.13                      | 0.92 (0.89-0.95) | <0.001  | 0.11 ± 0.10                      |
| <b>Late Diastolic Strain Rate (/s)</b>  |                 |                  |         |                                  |                  |         |                                  |
| Radial (SAX)                            | -0.48 ± 0.29    | 0.95 (0.92-0.96) | <0.001  | 0.06 ± 0.12                      | 0.97 (0.96-0.98) | <0.001  | 0.04 ± 0.08                      |
| Circumferential                         | 0.43 ± 0.23     | 0.93 (0.90-0.95) | <0.001  | 0.05 ± 0.10                      | 0.96 (0.93-0.97) | <0.001  | 0.04 ± 0.08                      |
| Longitudinal                            | 0.49 ± 0.17     | 0.76 (0.68-0.86) | <0.001  | 0.11 ± 0.11                      | 0.80 (0.71-0.87) | <0.001  | 0.11 ± 0.10                      |
| <b>Diastolic Strain Rate ratio</b>      |                 |                  |         |                                  |                  |         |                                  |
| Radial (SAX)                            | 3.85 ± 2.35     | 0.92 (0.88-0.95) | <0.001  | 0.62 ± 1.00                      | 0.92 (0.88-0.95) | <0.001  | 0.56 ± 1.04                      |
| Circumferential                         | 2.61 ± 1.71     | 0.89 (0.84-0.93) | <0.001  | 0.41 ± 0.80                      | 0.90 (0.85-0.93) | <0.001  | 0.38 ± 0.77                      |
| Longitudinal                            | 1.62 ± 0.76     | 0.77 (0.66-0.85) | <0.001  | 0.46 ± 0.45                      | 0.75 (0.63-0.84) | <0.001  | 0.45 ± 0.46                      |
| <b>Displacement (mm)</b>                |                 |                  |         |                                  |                  |         |                                  |
| Radial (SAX)                            | 4.50 ± 1.37     | 0.98 (0.97-0.99) | <0.001  | 0.25 ± 0.28                      | 0.99 (0.98-0.99) | <0.001  | 0.19 ± 0.22                      |
| Longitudinal                            | 3.01 ± 1.12     | 0.93 (0.90-0.95) | <0.001  | 0.44 ± 0.39                      | 0.95 (0.92-0.96) | <0.001  | 0.42 ± 0.34                      |
| <b>Time to Displacement (ms)</b>        |                 |                  |         |                                  |                  |         |                                  |
| Radial (SAX)                            | 309 ± 58        | 0.97 (0.95-0.98) | <0.001  | 9 ± 19                           | 0.97 (0.96-0.98) | <0.001  | 8 ± 17                           |
| Longitudinal                            | 307 ± 68        | 0.76 (0.66-0.84) | <0.001  | 40 ± 58                          | 0.79 (0.71-0.86) | <0.001  | 40 ± 53                          |
| <b>Systolic Velocity (m/s)</b>          |                 |                  |         |                                  |                  |         |                                  |
| Radial (SAX)                            | 26.0 ± 7.7      | 0.98 (0.97-0.99) | <0.001  | 1.6 ± 1.7                        | 0.98 (0.97-0.98) | <0.001  | 1.7 ± 1.7                        |
| Longitudinal                            | 19.9 ± 6.4      | 0.80 (0.72-0.86) | <0.001  | 4.4 ± 4.1                        | 0.83 (0.76-0.88) | <0.001  | 4.0 ± 3.6                        |
| <b>Early Diastolic Velocity (m/s)</b>   |                 |                  |         |                                  |                  |         |                                  |
| Radial (SAX)                            | -26.7 ± 10.5    | 0.98 (0.97-0.99) | <0.001  | 1.9 ± 2.0                        | 0.98 (0.98-0.99) | <0.001  | 1.8 ± 2.1                        |
| Longitudinal                            | -19.1 ± 8.6     | 0.88 (0.82-0.92) | <0.001  | 4.4 ± 4.4                        | 0.91 (0.87-0.93) | <0.001  | 4.1 ± 3.7                        |
| <b>Late Diastolic Velocity (m/s)</b>    |                 |                  |         |                                  |                  |         |                                  |
| Radial (SAX)                            | -12.0 ± 5.7     | 0.92 (0.86-0.95) | <0.001  | 1.5 ± 2.6                        | 0.95 (0.92-0.97) | <0.001  | 1.2 ± 2.2                        |
| Longitudinal                            | -12.8 ± 5.0     | 0.70 (0.55-0.80) | <0.001  | 3.6 ± 3.9                        | 0.62 (0.43-0.75) | <0.001  | 3.9 ± 4.3                        |
| <b>Diastolic Velocity ratio</b>         |                 |                  |         |                                  |                  |         |                                  |
| Radial (SAX)                            | 2.92 ± 2.03     | 0.90 (0.85-0.93) | <0.001  | 0.46 ± 1.01                      | 0.93 (0.90-0.95) | <0.001  | 0.36 ± 0.72                      |
| Longitudinal                            | 1.81 ± 0.98     | 0.56 (0.34-0.70) | <0.001  | 0.76 ± 1.20                      | 0.57 (0.35-0.71) | <0.001  | 0.73 ± 1.04                      |

The measurement for each parameter is shown as mean±SD averaged from all three reads for left ventricular 2D measurements. For inter-reader and intra-reader analysis, the intraclass correlation co-efficient (ICC) along with the 95% confidence intervals (CI) are shown, \*p<0.001. The disagreement between reads is reported as the mean±SD absolute difference ( $|\Delta|$ ). Radial measures are obtained from the short-axis view (SAX).

**Supplemental Table 4: 3D Left Ventricular Agreement**

| Factor                                  | Average Measure | Inter-reader     |         |                                  | Intra-reader     |         |                                  |
|-----------------------------------------|-----------------|------------------|---------|----------------------------------|------------------|---------|----------------------------------|
|                                         |                 | ICC (95% CI)     | p-value | Absolute Disagreement $ \Delta $ | ICC (95% CI)     | p-value | Absolute Disagreement $ \Delta $ |
| <b>Peak Strain (%)</b>                  |                 |                  |         |                                  |                  |         |                                  |
| Radial                                  | 24.7 ± 10.8     | 0.93 (0.88-0.95) | <0.001  | 4.0 ± 4.7                        | 0.93 (0.90-0.95) | <0.001  | 3.6 ± 4.7                        |
| Circumferential                         | -16.7 ± 5.2     | 0.98 (0.96-0.99) | <0.001  | 1.2 ± 1.3                        | 0.98 (0.97-0.99) | <0.001  | 1.1 ± 1.1                        |
| Longitudinal                            | -10.9 ± 4.0     | 0.93 (0.89-0.95) | <0.001  | 1.6 ± 1.6                        | 0.94 (0.91-0.96) | <0.001  | 1.5 ± 1.4                        |
| <b>Time to Peak Strain (ms)</b>         |                 |                  |         |                                  |                  |         |                                  |
| Radial                                  | 311 ± 57        | 0.80 (0.72-0.86) | <0.001  | 28 ± 43                          | 0.78 (0.69-0.85) | <0.001  | 30 ± 45                          |
| Circumferential                         | 314 ± 61        | 0.91 (0.87-0.94) | <0.001  | 21 ± 32                          | 0.91 (0.87-0.94) | <0.001  | 19 ± 32                          |
| Longitudinal                            | 333 ± 63        | 0.72 (0.60-0.80) | <0.001  | 39 ± 61                          | 0.41 (0.15-0.59) | 0.002   | 47 ± 84                          |
| <b>Systolic Strain Rate (/s)</b>        |                 |                  |         |                                  |                  |         |                                  |
| Radial                                  | 1.54 ± 0.66     | 0.82 (0.74-0.88) | <0.001  | 0.36 ± 0.47                      | 0.76 (0.66-0.83) | <0.001  | 0.40 ± 0.58                      |
| Circumferential                         | -0.90 ± 0.29    | 0.94 (0.91-0.96) | <0.001  | 0.10 ± 0.10                      | 0.95 (0.93-0.97) | <0.001  | 0.10 ± 0.08                      |
| Longitudinal                            | -0.67 ± 0.21    | 0.81 (0.73-0.87) | <0.001  | 0.13 ± 0.14                      | 0.82 (0.74-0.87) | <0.001  | 0.12 ± 0.12                      |
| <b>Early Diastolic Strain Rate (/s)</b> |                 |                  |         |                                  |                  |         |                                  |
| Radial                                  | -1.73 ± 0.87    | 0.81 (0.72-0.87) | <0.001  | 0.44 ± 0.64                      | 0.82 (0.74-0.88) | <0.001  | 0.45 ± 0.63                      |
| Circumferential                         | 0.97 ± 0.38     | 0.93 (0.90-0.95) | <0.001  | 0.12 ± 0.16                      | 0.93 (0.90-0.95) | <0.001  | 0.13 ± 0.16                      |
| Longitudinal                            | 0.65 ± 0.26     | 0.71 (0.57-0.80) | <0.001  | 0.20 ± 0.21                      | 0.77 (0.67-0.84) | <0.001  | 0.17 ± 0.19                      |
| <b>Late Diastolic Strain Rate (/s)</b>  |                 |                  |         |                                  |                  |         |                                  |
| Radial                                  | -0.54 ± 0.35    | 0.85 (0.76-0.90) | <0.001  | 0.18 ± 0.20                      | 0.76 (0.64-0.84) | <0.001  | 0.19 ± 0.29                      |
| Circumferential                         | 0.55 ± 0.27     | 0.90 (0.85-0.94) | <0.001  | 0.09 ± 0.14                      | 0.94 (0.91-0.96) | <0.001  | 0.09 ± 0.10                      |
| Longitudinal                            | 0.48 ± 0.20     | 0.68 (0.50-0.80) | <0.001  | 0.14 ± 0.20                      | 0.68 (0.51-0.79) | <0.001  | 0.14 ± 0.15                      |
| <b>Diastolic Strain Rate ratio</b>      |                 |                  |         |                                  |                  |         |                                  |
| Radial                                  | 4.24 ± 2.51     | 0.82 (0.70-0.88) | <0.001  | 1.58 ± 1.53                      | 0.73 (0.59-0.82) | <0.001  | 1.79 ± 1.98                      |
| Circumferential                         | 2.81 ± 1.30     | 0.86 (0.78-0.91) | <0.001  | 0.45 ± 0.77                      | 0.83 (0.75-0.89) | <0.001  | 0.55 ± 0.86                      |
| Longitudinal                            | 1.65 ± 1.03     | 0.68 (0.50-0.79) | <0.001  | 0.14 ± 0.57                      | 0.66 (0.49-0.77) | <0.001  | 0.55 ± 0.68                      |
| <b>Displacement (mm)</b>                |                 |                  |         |                                  |                  |         |                                  |
| Radial                                  | 4.30 ± 1.35     | 0.97 (0.96-0.98) | <0.001  | 0.26 ± 0.36                      | 0.99 (0.98-0.99) | <0.001  | 0.25 ± 0.36                      |
| Longitudinal                            | 5.97 ± 1.98     | 0.88 (0.83-0.92) | <0.001  | 0.97 ± 0.96                      | 0.90 (0.86-0.93) | <0.001  | 0.78 ± 0.74                      |
| <b>Time to Displacement (ms)</b>        |                 |                  |         |                                  |                  |         |                                  |
| Radial                                  | 309 ± 58        | 0.82 (0.74-0.88) | <0.001  | 19 ± 46                          | 0.89 (0.84-0.92) | <0.001  | 15 ± 36                          |
| Longitudinal                            | 327 ± 65        | 0.70 (0.56-0.79) | <0.001  | 47 ± 66                          | 0.60 (0.41-0.72) | <0.001  | 48 ± 74                          |
| <b>Systolic Velocity (m/s)</b>          |                 |                  |         |                                  |                  |         |                                  |
| Radial                                  | 25.0 ± 8.2      | 0.93 (0.90-0.95) | <0.001  | 2.2 ± 4.0                        | 0.97 (0.96-0.98) | <0.001  | 2.0 ± 1.9                        |
| Longitudinal                            | 40.6 ± 13.6     | 0.77 (0.67-0.84) | <0.001  | 9.2 ± 9.4                        | 0.87 (0.82-0.91) | <0.001  | 6.8 ± 6.7                        |
| <b>Early Diastolic Velocity (m/s)</b>   |                 |                  |         |                                  |                  |         |                                  |
| Radial                                  | -26.4 ± 10.0    | 0.95 (0.92-0.96) | <0.001  | 2.8 ± 3.7                        | 0.92 (0.88-0.94) | <0.001  | 3.0 ± 4.9                        |
| Longitudinal                            | -36.5 ± 13.6    | 0.72 (0.58-0.81) | <0.001  | 9.6 ± 10.8                       | 0.77 (0.66-0.84) | <0.001  | 9.8 ± 9.8                        |
| <b>Late Diastolic Velocity (m/s)</b>    |                 |                  |         |                                  |                  |         |                                  |
| Radial                                  | -11.7 ± 5.7     | 0.91 (0.87-0.94) | <0.001  | 1.9 ± 2.6                        | 0.91 (0.87-0.94) | <0.001  | 1.7 ± 2.7                        |
| Longitudinal                            | -27.1 ± 9.6     | 0.65 (0.45-0.78) | <0.001  | 7.7 ± 8.3                        | 0.70 (0.55-0.80) | <0.001  | 6.9 ± 6.5                        |
| <b>Diastolic Velocity ratio</b>         |                 |                  |         |                                  |                  |         |                                  |
| Radial                                  | 2.92 ± 1.86     | 0.88 (0.81-0.92) | <0.001  | 0.60 ± 1.01                      | 0.90 (0.84-0.93) | <0.001  | 0.57 ± 1.00                      |
| Longitudinal                            | 1.54 ± 1.11     | 0.38 (0.03-0.60) | 0.019   | 0.98 ± 2.52                      | 0.11(-0.34-0.41) | 0.284   | 1.11 ± 2.73                      |

The measurement for each parameter is shown as mean±SD averaged from all three reads for 3D left-ventricular feature tracking. For inter-reader and intra-reader analysis, the intraclass correlation co-efficient (ICC) along with the 95% confidence intervals (CI) are shown, \*p<0.001. The disagreement between reads is reported as the mean±SD absolute difference ( $|\Delta|$ ).

**Supplemental Table 5: Right Ventricular Agreement**

| Factor                                  | Average Measure | Inter-reader     |         |                                  | Intra-reader     |         |                                  |
|-----------------------------------------|-----------------|------------------|---------|----------------------------------|------------------|---------|----------------------------------|
|                                         |                 | ICC (95% CI)     | p-value | Absolute Disagreement $ \Delta $ | ICC (95% CI)     | p-value | Absolute Disagreement $ \Delta $ |
| <b>Peak Strain (%)</b>                  |                 |                  |         |                                  |                  |         |                                  |
| Radial (LAX)                            | 40.1 ± 16.3     | 0.80 (0.70-0.87) | <0.001  | 8.7 ± 10.3                       | 0.87 (0.80-0.91) | <0.001  | 7.6 ± 9.4                        |
| Longitudinal                            | -18.5 ± 5.4     | 0.84 (0.75-0.89) | <0.001  | 2.7 ± 3.0                        | 0.91 (0.87-0.94) | <0.001  | 2.1 ± 2.4                        |
| <b>Time to Peak Strain (ms)</b>         |                 |                  |         |                                  |                  |         |                                  |
| Radial (LAX)                            | 310 ± 64        | 0.62 (0.43-0.75) | <0.001  | 36 ± 58                          | 0.68 (0.53-0.78) | <0.001  | 42 ± 72                          |
| Longitudinal                            | 303 ± 58        | 0.66 (0.49-0.77) | <0.001  | 33 ± 49                          | 0.71 (0.58-0.81) | <0.001  | 34 ± 64                          |
| <b>Systolic Strain Rate (/s)</b>        |                 |                  |         |                                  |                  |         |                                  |
| Radial (LAX)                            | 2.36 ± 1.02     | 0.68 (0.53-0.79) | <0.001  | 0.64 ± 0.77                      | 0.81 (0.71-0.87) | <0.001  | 0.65 ± 0.63                      |
| Longitudinal                            | -1.21 ± 0.45    | 0.69 (0.53-0.79) | <0.001  | 0.30 ± 0.44                      | 0.87 (0.81-0.91) | <0.001  | 0.27 ± 0.28                      |
| <b>Early Diastolic Strain Rate (/s)</b> |                 |                  |         |                                  |                  |         |                                  |
| Radial (LAX)                            | -2.52 ± 1.23    | 0.81 (0.71-0.87) | <0.001  | 0.74 ± 0.78                      | 0.86 (0.79-0.91) | <0.001  | 0.65 ± 0.64                      |
| Longitudinal                            | 0.99 ± 0.38     | 0.86 (0.80-0.91) | <0.001  | 0.21 ± 0.20                      | 0.85 (0.77-0.90) | <0.001  | 0.20 ± 0.20                      |
| <b>Late Diastolic Strain Rate (/s)</b>  |                 |                  |         |                                  |                  |         |                                  |
| Radial (LAX)                            | -1.29 ± 0.75    | 0.91 (0.85-0.95) | <0.001  | 0.34 ± 0.35                      | 0.82 (0.72-0.89) | <0.001  | 0.46 ± 0.46                      |
| Longitudinal                            | 0.88 ± 0.45     | 0.86 (0.77-0.92) | <0.001  | 0.25 ± 0.30                      | 0.88 (0.81-0.93) | <0.001  | 0.24 ± 0.20                      |
| <b>Diastolic Strain Rate ratio</b>      |                 |                  |         |                                  |                  |         |                                  |
| Radial (LAX)                            | 2.59 ± 1.83     | 0.74 (0.55-0.85) | <0.001  | 0.77 ± 1.27                      | 0.79 (0.66-0.87) | <0.001  | 0.84 ± 1.02                      |
| Longitudinal                            | 1.39 ± 0.90     | 0.69 (0.47-0.81) | <0.001  | 0.54 ± 0.87                      | 0.78 (0.64-0.86) | <0.001  | 0.50 ± 0.73                      |
| <b>Displacement (mm)</b>                |                 |                  |         |                                  |                  |         |                                  |
| Radial (LAX)                            | 5.35 ± 2.20     | 0.91 (0.87-0.94) | <0.001  | 0.86 ± 0.98                      | 0.94 (0.91-0.96) | <0.001  | 0.65 ± 0.87                      |
| Longitudinal                            | 6.63 ± 2.88     | 0.92 (0.87-0.94) | <0.001  | 1.29 ± 1.19                      | 0.94 (0.90-0.96) | <0.001  | 1.00 ± 1.06                      |
| <b>Time to Displacement (ms)</b>        |                 |                  |         |                                  |                  |         |                                  |
| Radial (LAX)                            | 291 ± 47        | 0.69 (0.54-0.79) | <0.001  | 18 ± 48                          | 0.82 (0.74-0.88) | <0.001  | 19 ± 37                          |
| Longitudinal                            | 318 ± 59        | 0.61 (0.43-0.74) | <0.001  | 34 ± 59                          | 0.81 (0.72-0.87) | <0.001  | 28 ± 50                          |
| <b>Systolic Velocity (m/s)</b>          |                 |                  |         |                                  |                  |         |                                  |
| Radial (LAX)                            | 33.2 ± 14.2     | 0.92 (0.88-0.95) | <0.001  | 5.6 ± 5.9                        | 0.92 (0.89-0.95) | <0.001  | 5.0 ± 5.5                        |
| Longitudinal                            | 45.1 ± 17.4     | 0.83 (0.74-0.88) | <0.001  | 10.0 ± 10.8                      | 0.89 (0.84-0.93) | <0.001  | 8.0 ± 8.4                        |
| <b>Early Diastolic Velocity (m/s)</b>   |                 |                  |         |                                  |                  |         |                                  |
| Radial (LAX)                            | -31.7 ± 13.4    | 0.91 (0.87-0.94) | <0.001  | 5.8 ± 6.0                        | 0.92 (0.88-0.95) | <0.001  | 4.9 ± 5.4                        |
| Longitudinal                            | -35.1 ± 16.4    | 0.88 (0.81-0.92) | <0.001  | 7.3 ± 7.6                        | 0.90 (0.84-0.93) | <0.001  | 6.5 ± 7.4                        |
| <b>Late Diastolic Velocity (m/s)</b>    |                 |                  |         |                                  |                  |         |                                  |
| Radial (LAX)                            | -13.5 ± 8.8     | 0.88 (0.77-0.93) | <0.001  | 4.2 ± 4.5                        | 0.93 (0.88-0.96) | <0.001  | 3.4 ± 3.3                        |
| Longitudinal                            | -32.6 ± 16.9    | 0.93 (0.88-0.96) | <0.001  | 7.4 ± 5.0                        | 0.95 (0.92-0.97) | <0.001  | 5.5 ± 5.3                        |
| <b>Diastolic Velocity ratio</b>         |                 |                  |         |                                  |                  |         |                                  |
| Radial (LAX)                            | 3.55 ± 4.90     | 0.71 (0.46-0.85) | <0.001  | 0.84 ± 1.36                      | 0.90 (0.82-0.94) | <0.001  | 0.69 ± 0.61                      |
| Longitudinal                            | 1.35 ± 1.03     | 0.78 (0.63-0.87) | <0.001  | 0.40 ± 0.44                      | 0.89 (0.82-0.93) | <0.001  | 0.28 ± 0.36                      |

The measurement for each parameter is shown as mean±SD averaged from all three reads for right ventricular feature tracking. For inter-reader and intra-reader analysis, the intraclass correlation coefficient (ICC) along with the 95% confidence intervals (CI) are shown, \*p<0.001. The disagreement between reads is reported as the mean±SD absolute difference ( $|\Delta|$ ). Radial measures are obtained from the long-axis view (LAX).
